# Supplementary material
Source: publisher figshare collection journal article supplement (https://acs.figshare.com/ndownloader/files/5088988)
Supplement: Supplementary file 1 [file 5088988]

  
data_030908b 
  
_audit_creation_method            SHELXL-97 
_chemical_name_systematic 
; 
 ? 
; 
_chemical_name_common             ? 
_chemical_melting_point           ? 
_chemical_formula_moiety          ? 
_chemical_formula_sum 
 'C22 H12 Fe4 N2 O12 S4' 
_chemical_formula_weight          847.98 
  
loop_ 
 _atom_type_symbol 
 _atom_type_description 
 _atom_type_scat_dispersion_real 
 _atom_type_scat_dispersion_imag 
 _atom_type_scat_source 
 'C'  'C'   0.0033   0.0016 
 'International Tables Vol C Tables 4.2.6.8 and 6.1.1.4' 
 'H'  'H'   0.0000   0.0000 
 'International Tables Vol C Tables 4.2.6.8 and 6.1.1.4' 
 'N'  'N'   0.0061   0.0033 
 'International Tables Vol C Tables 4.2.6.8 and 6.1.1.4' 
 'O'  'O'   0.0106   0.0060 
 'International Tables Vol C Tables 4.2.6.8 and 6.1.1.4' 
 'S'  'S'   0.1246   0.1234 
 'International Tables Vol C Tables 4.2.6.8 and 6.1.1.4' 
 'Fe'  'Fe'   0.3463   0.8444 
 'International Tables Vol C Tables 4.2.6.8 and 6.1.1.4' 
  
_symmetry_cell_setting            Monoclinic 
_symmetry_space_group_name_H-M    C2/c 
  
loop_ 
 _symmetry_equiv_pos_as_xyz 
 'x, y, z' 
 '-x, y, -z+1/2' 
 'x+1/2, y+1/2, z' 
 '-x+1/2, y+1/2, -z+1/2' 
 '-x, -y, -z' 
 'x, -y, z-1/2' 
 '-x+1/2, -y+1/2, -z' 
 'x+1/2, -y+1/2, z-1/2' 
  
_cell_length_a                    28.406(13) 
_cell_length_b                    7.598(3) 
_cell_length_c                    15.657(7) 
_cell_angle_alpha                 90.00 
_cell_angle_beta                  113.949(7) 
_cell_angle_gamma                 90.00 
_cell_volume                      3088(2) 
_cell_formula_units_Z             4 
_cell_measurement_temperature     293(2) 
_cell_measurement_reflns_used     1021 
_cell_measurement_theta_min       3.27 
_cell_measurement_theta_max       25.34 
  
_exptl_crystal_description        ? 
_exptl_crystal_colour             ? 
_exptl_crystal_size_max           0.26 
_exptl_crystal_size_mid           0.22 
_exptl_crystal_size_min           0.16 
_exptl_crystal_density_meas       NONE 
_exptl_crystal_density_diffrn     1.824 
_exptl_crystal_density_method     'not measured' 
_exptl_crystal_F_000              1688 
_exptl_absorpt_coefficient_mu     2.173 
_exptl_absorpt_correction_type    MULTI-SCAN 
_exptl_absorpt_correction_T_min   0.828806 
_exptl_absorpt_correction_T_max   1.000000 
_exptl_absorpt_process_details    SADABS 
  
_exptl_special_details 
; 
 ? 
; 
  
_diffrn_ambient_temperature       293(2) 
_diffrn_radiation_wavelength      0.71073 
_diffrn_radiation_type            MoK\a 
_diffrn_radiation_source          'fine-focus sealed tube' 
_diffrn_radiation_monochromator   graphite 
_diffrn_measurement_device_type   'CCD area detector' 
_diffrn_measurement_method        'phi and omega scans' 
_diffrn_detector_area_resol_mean  ? 
_diffrn_standards_number          ? 
_diffrn_standards_interval_count  ? 
_diffrn_standards_interval_time   ? 
_diffrn_standards_decay_%         ? 
_diffrn_reflns_number             8628 
_diffrn_reflns_av_R_equivalents   0.0298 
_diffrn_reflns_av_sigmaI/netI     0.0367 
_diffrn_reflns_limit_h_min        -25 
_diffrn_reflns_limit_h_max        35 
_diffrn_reflns_limit_k_min        -8 
_diffrn_reflns_limit_k_max        9 
_diffrn_reflns_limit_l_min        -18 
_diffrn_reflns_limit_l_max        19 
_diffrn_reflns_theta_min          1.57 
_diffrn_reflns_theta_max          26.41 
_reflns_number_total              3171 
_reflns_number_gt                 2337 
_reflns_threshold_expression      >2sigma(I) 
  
_computing_data_collection        'Bruker SMART' 
_computing_cell_refinement        'Bruker SMART' 
_computing_data_reduction         'Bruker SAINT' 
_computing_structure_solution     'SHELXS-97 (Sheldrick, 1990)' 
_computing_structure_refinement   'SHELXL-97 (Sheldrick, 1997)' 
_computing_molecular_graphics     'Bruker SHELXTL' 
_computing_publication_material   'Bruker SHELXTL' 
  
_refine_special_details 
; 
 Refinement of F^2^ against ALL reflections.  The weighted R-factor wR and 
 goodness of fit S are based on F^2^, conventional R-factors R are based 
 on F, with F set to zero for negative F^2^. The threshold expression of 
 F^2^ > 2sigma(F^2^) is used only for calculating R-factors(gt) etc. and is 
 not relevant to the choice of reflections for refinement.  R-factors based 
 on F^2^ are statistically about twice as large as those based on F, and R- 
 factors based on ALL data will be even larger. 
; 
  
_refine_ls_structure_factor_coef  Fsqd 
_refine_ls_matrix_type            full 
_refine_ls_weighting_scheme       calc 
_refine_ls_weighting_details 
 'calc w=1/[\s^2^(Fo^2^)+(0.0423P)^2^+2.2887P] where P=(Fo^2^+2Fc^2^)/3' 
_atom_sites_solution_primary      direct 
_atom_sites_solution_secondary    difmap 
_atom_sites_solution_hydrogens    geom 
_refine_ls_hydrogen_treatment     mixed 
_refine_ls_extinction_method      none 
_refine_ls_extinction_coef        ? 
_refine_ls_number_reflns          3171 
_refine_ls_number_parameters      199 
_refine_ls_number_restraints      0 
_refine_ls_R_factor_all           0.0583 
_refine_ls_R_factor_gt            0.0354 
_refine_ls_wR_factor_ref          0.0890 
_refine_ls_wR_factor_gt           0.0794 
_refine_ls_goodness_of_fit_ref    1.029 
_refine_ls_restrained_S_all       1.029 
_refine_ls_shift/su_max           0.006 
_refine_ls_shift/su_mean          0.001 
  
loop_ 
 _atom_site_label 
 _atom_site_type_symbol 
 _atom_site_fract_x 
 _atom_site_fract_y 
 _atom_site_fract_z 
 _atom_site_U_iso_or_equiv 
 _atom_site_adp_type 
 _atom_site_occupancy 
 _atom_site_symmetry_multiplicity 
 _atom_site_calc_flag 
 _atom_site_refinement_flags 
 _atom_site_disorder_assembly 
 _atom_site_disorder_group 
Fe1 Fe 0.154802(18) 0.38164(6) 0.29678(3) 0.04375(15) Uani 1 1 d . . . 
Fe2 Fe 0.110464(18) 0.67261(6) 0.25881(3) 0.04136(15) Uani 1 1 d . . . 
S1 S 0.08635(3) 0.44997(12) 0.32749(6) 0.0472(2) Uani 1 1 d . . . 
S2 S 0.18884(3) 0.62973(12) 0.37407(6) 0.0459(2) Uani 1 1 d . . . 
O1 O 0.07164(14) 0.9852(4) 0.3158(2) 0.0916(10) Uani 1 1 d . . . 
O2 O 0.16072(12) 0.8287(5) 0.1473(2) 0.0907(10) Uani 1 1 d . . . 
O3 O 0.02011(12) 0.5914(4) 0.0908(2) 0.0915(11) Uani 1 1 d . . . 
O4 O 0.22859(13) 0.3998(6) 0.2110(2) 0.1084(13) Uani 1 1 d . . . 
O5 O 0.20225(15) 0.1044(4) 0.4336(3) 0.1087(13) Uani 1 1 d . . . 
O6 O 0.13412(11) 0.6564(4) 0.48181(18) 0.0705(8) Uani 1 1 d . . . 
N1 N 0.07985(12) 0.1796(4) 0.1353(2) 0.0522(7) Uani 1 1 d . . . 
C1 C 0.08746(16) 0.8635(5) 0.2952(3) 0.0551(9) Uani 1 1 d . . . 
C2 C 0.14150(15) 0.7698(5) 0.1921(3) 0.0566(9) Uani 1 1 d . . . 
C3 C 0.05520(15) 0.6240(5) 0.1562(3) 0.0552(9) Uani 1 1 d . . . 
C4 C 0.19990(15) 0.3909(6) 0.2450(3) 0.0680(12) Uani 1 1 d . . . 
C5 C 0.18410(16) 0.2111(6) 0.3799(3) 0.0660(11) Uani 1 1 d . . . 
C6 C 0.18400(14) 0.6432(6) 0.4865(2) 0.0590(10) Uani 1 1 d . . . 
H6A H 0.2001 0.5395 0.5227 0.071 Uiso 1 1 calc R . . 
H6B H 0.2035 0.7448 0.5200 0.071 Uiso 1 1 calc R . . 
C7 C 0.10595(15) 0.5013(6) 0.4517(3) 0.0629(10) Uani 1 1 d . . . 
H7A H 0.0753 0.5094 0.4643 0.075 Uiso 1 1 calc R . . 
H7B H 0.1265 0.4044 0.4884 0.075 Uiso 1 1 calc R . . 
C8 C 0.10964(13) 0.2534(5) 0.1978(2) 0.0475(8) Uani 1 1 d . . . 
C9 C 0.03952(13) 0.0887(4) 0.0664(2) 0.0425(8) Uani 1 1 d . . . 
C10 C -0.00746(14) 0.0828(4) 0.0717(2) 0.0494(9) Uani 1 1 d . . . 
H10 H -0.0123 0.1392 0.1203 0.059 Uiso 1 1 calc R . . 
C11 C 0.04741(13) 0.0071(5) -0.0048(2) 0.0488(8) Uani 1 1 d . . . 
H11 H 0.0794 0.0124 -0.0077 0.059 Uiso 1 1 calc R . . 
  
loop_ 
 _atom_site_aniso_label 
 _atom_site_aniso_U_11 
 _atom_site_aniso_U_22 
 _atom_site_aniso_U_33 
 _atom_site_aniso_U_23 
 _atom_site_aniso_U_13 
 _atom_site_aniso_U_12 
Fe1 0.0340(3) 0.0480(3) 0.0373(3) -0.0076(2) 0.0022(2) 0.0006(2) 
Fe2 0.0373(3) 0.0459(3) 0.0347(2) 0.0002(2) 0.0082(2) -0.0014(2) 
S1 0.0364(4) 0.0535(5) 0.0455(5) 0.0035(4) 0.0101(4) -0.0055(4) 
S2 0.0352(4) 0.0582(5) 0.0362(4) -0.0086(4) 0.0060(4) -0.0088(4) 
O1 0.136(3) 0.068(2) 0.097(2) 0.0127(17) 0.075(2) 0.031(2) 
O2 0.072(2) 0.136(3) 0.070(2) 0.0247(19) 0.0350(18) -0.007(2) 
O3 0.067(2) 0.107(2) 0.0601(18) 0.0095(17) -0.0160(16) -0.0170(18) 
O4 0.062(2) 0.189(4) 0.078(2) -0.029(2) 0.0323(19) 0.009(2) 
O5 0.106(3) 0.077(2) 0.095(2) 0.0225(19) -0.008(2) 0.024(2) 
O6 0.0716(19) 0.089(2) 0.0506(15) -0.0111(14) 0.0246(14) 0.0009(16) 
N1 0.0518(18) 0.0533(17) 0.0368(15) -0.0057(13) 0.0030(14) -0.0101(15) 
C1 0.064(2) 0.057(2) 0.049(2) 0.0098(17) 0.0268(19) 0.008(2) 
C2 0.047(2) 0.071(3) 0.045(2) 0.0002(18) 0.0117(18) 0.000(2) 
C3 0.049(2) 0.058(2) 0.047(2) 0.0082(17) 0.0073(18) -0.0034(18) 
C4 0.042(2) 0.101(3) 0.051(2) -0.026(2) 0.0084(19) 0.004(2) 
C5 0.056(2) 0.062(3) 0.055(2) -0.008(2) -0.004(2) 0.007(2) 
C6 0.047(2) 0.086(3) 0.0356(18) -0.0132(18) 0.0087(17) -0.005(2) 
C7 0.059(2) 0.084(3) 0.051(2) 0.006(2) 0.0268(19) -0.006(2) 
C8 0.045(2) 0.0455(19) 0.0423(19) -0.0006(16) 0.0083(17) 0.0035(17) 
C9 0.0460(19) 0.0391(17) 0.0286(15) 0.0014(13) 0.0011(14) -0.0058(15) 
C10 0.056(2) 0.054(2) 0.0329(17) -0.0075(15) 0.0121(16) -0.0037(18) 
C11 0.0437(19) 0.061(2) 0.0371(17) -0.0031(16) 0.0117(15) -0.0078(17) 
  
_geom_special_details 
; 
 All esds (except the esd in the dihedral angle between two l.s. planes) 
 are estimated using the full covariance matrix.  The cell esds are taken 
 into account individually in the estimation of esds in distances, angles 
 and torsion angles; correlations between esds in cell parameters are only 
 used when they are defined by crystal symmetry.  An approximate (isotropic) 
 treatment of cell esds is used for estimating esds involving l.s. planes. 
; 
  
loop_ 
 _geom_bond_atom_site_label_1 
 _geom_bond_atom_site_label_2 
 _geom_bond_distance 
 _geom_bond_site_symmetry_2 
 _geom_bond_publ_flag 
Fe1 C4 1.774(5) . ? 
Fe1 C5 1.785(4) . ? 
Fe1 C8 1.840(3) . ? 
Fe1 S2 2.2366(12) . ? 
Fe1 S1 2.2453(13) . ? 
Fe1 Fe2 2.4938(11) . ? 
Fe2 C3 1.770(4) . ? 
Fe2 C1 1.777(4) . ? 
Fe2 C2 1.779(4) . ? 
Fe2 S2 2.2490(12) . ? 
Fe2 S1 2.2551(12) . ? 
S1 C7 1.835(4) . ? 
S2 C6 1.823(4) . ? 
O1 C1 1.131(4) . ? 
O2 C2 1.140(4) . ? 
O3 C3 1.129(4) . ? 
O4 C4 1.142(5) . ? 
O5 C5 1.131(5) . ? 
O6 C7 1.394(5) . ? 
O6 C6 1.392(5) . ? 
N1 C8 1.146(4) . ? 
N1 C9 1.397(4) . ? 
C6 H6A 0.9700 . ? 
C6 H6B 0.9700 . ? 
C7 H7A 0.9700 . ? 
C7 H7B 0.9700 . ? 
C9 C10 1.371(5) . ? 
C9 C11 1.371(5) . ? 
C10 C11 1.373(4) 5 ? 
C10 H10 0.9300 . ? 
C11 C10 1.373(4) 5 ? 
C11 H11 0.9300 . ? 
  
loop_ 
 _geom_angle_atom_site_label_1 
 _geom_angle_atom_site_label_2 
 _geom_angle_atom_site_label_3 
 _geom_angle 
 _geom_angle_site_symmetry_1 
 _geom_angle_site_symmetry_3 
 _geom_angle_publ_flag 
C4 Fe1 C5 98.8(2) . . ? 
C4 Fe1 C8 91.25(17) . . ? 
C5 Fe1 C8 100.90(17) . . ? 
C4 Fe1 S2 88.86(14) . . ? 
C5 Fe1 S2 104.25(13) . . ? 
C8 Fe1 S2 154.54(11) . . ? 
C4 Fe1 S1 159.67(15) . . ? 
C5 Fe1 S1 101.53(15) . . ? 
C8 Fe1 S1 86.25(12) . . ? 
S2 Fe1 S1 84.90(4) . . ? 
C4 Fe1 Fe2 104.16(15) . . ? 
C5 Fe1 Fe2 149.13(14) . . ? 
C8 Fe1 Fe2 99.02(11) . . ? 
S2 Fe1 Fe2 56.46(4) . . ? 
S1 Fe1 Fe2 56.54(3) . . ? 
C3 Fe2 C1 98.92(18) . . ? 
C3 Fe2 C2 91.26(17) . . ? 
C1 Fe2 C2 100.59(18) . . ? 
C3 Fe2 S2 157.27(13) . . ? 
C1 Fe2 S2 103.54(13) . . ? 
C2 Fe2 S2 88.07(13) . . ? 
C3 Fe2 S1 86.97(12) . . ? 
C1 Fe2 S1 103.72(13) . . ? 
C2 Fe2 S1 155.61(14) . . ? 
S2 Fe2 S1 84.38(4) . . ? 
C3 Fe2 Fe1 101.97(13) . . ? 
C1 Fe2 Fe1 149.67(12) . . ? 
C2 Fe2 Fe1 100.68(13) . . ? 
S2 Fe2 Fe1 55.99(3) . . ? 
S1 Fe2 Fe1 56.16(4) . . ? 
C7 S1 Fe1 111.08(13) . . ? 
C7 S1 Fe2 109.01(14) . . ? 
Fe1 S1 Fe2 67.30(4) . . ? 
C6 S2 Fe1 112.59(14) . . ? 
C6 S2 Fe2 109.17(13) . . ? 
Fe1 S2 Fe2 67.55(3) . . ? 
C7 O6 C6 112.9(3) . . ? 
C8 N1 C9 172.2(4) . . ? 
O1 C1 Fe2 178.0(4) . . ? 
O2 C2 Fe2 178.0(4) . . ? 
O3 C3 Fe2 179.3(4) . . ? 
O4 C4 Fe1 178.8(5) . . ? 
O5 C5 Fe1 178.7(4) . . ? 
O6 C6 S2 115.3(2) . . ? 
O6 C6 H6A 108.5 . . ? 
S2 C6 H6A 108.5 . . ? 
O6 C6 H6B 108.5 . . ? 
S2 C6 H6B 108.5 . . ? 
H6A C6 H6B 107.5 . . ? 
O6 C7 S1 115.1(3) . . ? 
O6 C7 H7A 108.5 . . ? 
S1 C7 H7A 108.5 . . ? 
O6 C7 H7B 108.5 . . ? 
S1 C7 H7B 108.5 . . ? 
H7A C7 H7B 107.5 . . ? 
N1 C8 Fe1 176.8(3) . . ? 
C10 C9 C11 121.2(3) . . ? 
C10 C9 N1 118.9(3) . . ? 
C11 C9 N1 119.9(3) . . ? 
C9 C10 C11 119.5(3) . 5 ? 
C9 C10 H10 120.2 . . ? 
C11 C10 H10 120.2 5 . ? 
C9 C11 C10 119.2(3) . 5 ? 
C9 C11 H11 120.4 . . ? 
C10 C11 H11 120.4 5 . ? 
  
loop_ 
 _geom_torsion_atom_site_label_1 
 _geom_torsion_atom_site_label_2 
 _geom_torsion_atom_site_label_3 
 _geom_torsion_atom_site_label_4 
 _geom_torsion 
 _geom_torsion_site_symmetry_1 
 _geom_torsion_site_symmetry_2 
 _geom_torsion_site_symmetry_3 
 _geom_torsion_site_symmetry_4 
 _geom_torsion_publ_flag 
C4 Fe1 Fe2 C3 94.94(18) . . . . ? 
C5 Fe1 Fe2 C3 -128.3(3) . . . . ? 
C8 Fe1 Fe2 C3 1.34(17) . . . . ? 
S2 Fe1 Fe2 C3 173.88(13) . . . . ? 
S1 Fe1 Fe2 C3 -78.04(14) . . . . ? 
C4 Fe1 Fe2 C1 -132.5(3) . . . . ? 
C5 Fe1 Fe2 C1 4.2(4) . . . . ? 
C8 Fe1 Fe2 C1 133.9(3) . . . . ? 
S2 Fe1 Fe2 C1 -53.6(3) . . . . ? 
S1 Fe1 Fe2 C1 54.5(3) . . . . ? 
C4 Fe1 Fe2 C2 1.34(17) . . . . ? 
C5 Fe1 Fe2 C2 138.1(3) . . . . ? 
C8 Fe1 Fe2 C2 -92.26(17) . . . . ? 
S2 Fe1 Fe2 C2 80.28(13) . . . . ? 
S1 Fe1 Fe2 C2 -171.64(12) . . . . ? 
C4 Fe1 Fe2 S2 -78.94(13) . . . . ? 
C5 Fe1 Fe2 S2 57.8(3) . . . . ? 
C8 Fe1 Fe2 S2 -172.54(12) . . . . ? 
S1 Fe1 Fe2 S2 108.08(5) . . . . ? 
C4 Fe1 Fe2 S1 172.98(12) . . . . ? 
C5 Fe1 Fe2 S1 -50.3(3) . . . . ? 
C8 Fe1 Fe2 S1 79.38(12) . . . . ? 
S2 Fe1 Fe2 S1 -108.08(5) . . . . ? 
C4 Fe1 S1 C7 -122.5(4) . . . . ? 
C5 Fe1 S1 C7 53.69(19) . . . . ? 
C8 Fe1 S1 C7 154.06(18) . . . . ? 
S2 Fe1 S1 C7 -49.84(15) . . . . ? 
Fe2 Fe1 S1 C7 -102.54(15) . . . . ? 
C4 Fe1 S1 Fe2 -19.9(4) . . . . ? 
C5 Fe1 S1 Fe2 156.24(13) . . . . ? 
C8 Fe1 S1 Fe2 -103.39(11) . . . . ? 
S2 Fe1 S1 Fe2 52.70(4) . . . . ? 
C3 Fe2 S1 C7 -147.85(19) . . . . ? 
C1 Fe2 S1 C7 -49.40(19) . . . . ? 
C2 Fe2 S1 C7 125.8(3) . . . . ? 
S2 Fe2 S1 C7 53.20(14) . . . . ? 
Fe1 Fe2 S1 C7 105.56(15) . . . . ? 
C3 Fe2 S1 Fe1 106.60(14) . . . . ? 
C1 Fe2 S1 Fe1 -154.96(13) . . . . ? 
C2 Fe2 S1 Fe1 20.2(3) . . . . ? 
S2 Fe2 S1 Fe1 -52.35(4) . . . . ? 
C4 Fe1 S2 C6 -149.8(2) . . . . ? 
C5 Fe1 S2 C6 -51.1(2) . . . . ? 
C8 Fe1 S2 C6 119.6(3) . . . . ? 
S1 Fe1 S2 C6 49.52(14) . . . . ? 
Fe2 Fe1 S2 C6 102.29(14) . . . . ? 
C4 Fe1 S2 Fe2 107.86(14) . . . . ? 
C5 Fe1 S2 Fe2 -153.39(15) . . . . ? 
C8 Fe1 S2 Fe2 17.3(3) . . . . ? 
S1 Fe1 S2 Fe2 -52.77(4) . . . . ? 
C3 Fe2 S2 C6 -122.9(4) . . . . ? 
C1 Fe2 S2 C6 48.05(19) . . . . ? 
C2 Fe2 S2 C6 148.5(2) . . . . ? 
S1 Fe2 S2 C6 -54.74(15) . . . . ? 
Fe1 Fe2 S2 C6 -107.25(15) . . . . ? 
C3 Fe2 S2 Fe1 -15.6(3) . . . . ? 
C1 Fe2 S2 Fe1 155.30(13) . . . . ? 
C2 Fe2 S2 Fe1 -104.28(13) . . . . ? 
S1 Fe2 S2 Fe1 52.51(4) . . . . ? 
C3 Fe2 C1 O1 -13(11) . . . . ? 
C2 Fe2 C1 O1 80(11) . . . . ? 
S2 Fe2 C1 O1 171(100) . . . . ? 
S1 Fe2 C1 O1 -102(11) . . . . ? 
Fe1 Fe2 C1 O1 -146(11) . . . . ? 
C3 Fe2 C2 O2 -34(11) . . . . ? 
C1 Fe2 C2 O2 -133(11) . . . . ? 
S2 Fe2 C2 O2 123(11) . . . . ? 
S1 Fe2 C2 O2 51(11) . . . . ? 
Fe1 Fe2 C2 O2 68(11) . . . . ? 
C1 Fe2 C3 O3 -161(100) . . . . ? 
C2 Fe2 C3 O3 98(35) . . . . ? 
S2 Fe2 C3 O3 10(35) . . . . ? 
S1 Fe2 C3 O3 -57(35) . . . . ? 
Fe1 Fe2 C3 O3 -3(35) . . . . ? 
C5 Fe1 C4 O4 -163(17) . . . . ? 
C8 Fe1 C4 O4 96(17) . . . . ? 
S2 Fe1 C4 O4 -58(17) . . . . ? 
S1 Fe1 C4 O4 14(18) . . . . ? 
Fe2 Fe1 C4 O4 -3(17) . . . . ? 
C4 Fe1 C5 O5 153(21) . . . . ? 
C8 Fe1 C5 O5 -114(21) . . . . ? 
S2 Fe1 C5 O5 62(21) . . . . ? 
S1 Fe1 C5 O5 -26(21) . . . . ? 
Fe2 Fe1 C5 O5 15(21) . . . . ? 
C7 O6 C6 S2 70.2(4) . . . . ? 
Fe1 S2 C6 O6 -66.0(3) . . . . ? 
Fe2 S2 C6 O6 6.9(3) . . . . ? 
C6 O6 C7 S1 -71.9(4) . . . . ? 
Fe1 S1 C7 O6 68.3(3) . . . . ? 
Fe2 S1 C7 O6 -4.0(3) . . . . ? 
C9 N1 C8 Fe1 -64(7) . . . . ? 
C4 Fe1 C8 N1 -120(6) . . . . ? 
C5 Fe1 C8 N1 141(6) . . . . ? 
S2 Fe1 C8 N1 -30(6) . . . . ? 
S1 Fe1 C8 N1 40(6) . . . . ? 
Fe2 Fe1 C8 N1 -15(6) . . . . ? 
C8 N1 C9 C10 16(3) . . . . ? 
C8 N1 C9 C11 -164(2) . . . . ? 
C11 C9 C10 C11 0.2(6) . . . 5 ? 
N1 C9 C10 C11 -179.6(3) . . . 5 ? 
C10 C9 C11 C10 -0.2(6) . . . 5 ? 
N1 C9 C11 C10 179.6(3) . . . 5 ? 
  
_diffrn_measured_fraction_theta_max    0.996 
_diffrn_reflns_theta_full              26.41 
_diffrn_measured_fraction_theta_full   0.996 
_refine_diff_density_max    0.700 
_refine_diff_density_min   -0.292 
_refine_diff_density_rms    0.072 
